# Supplementary material for: Design of β-Keto Esters with Antibacterial Activity: Synthesis, In Vitro Evaluation, and Theoretical Assessment of Their Reactivity and Quorum-Sensing Inhibition Capacity
Source: MDPI journal article supplement (doi:10.3390/ph16101339), 2023-09-22
Supplement: s1 [file s1]

# Design of $\beta$ -ketoesters with Antibacterial Activity: Synthesis, *In Vitro* Evaluation and Theoretical Assessment of Their Reactivity and Quorum Sensing Inhibition Capacity

Maximiliano Martínez-Cifuentes <sup>1,\*</sup>, Emmanuel Soto-Tapia <sup>1</sup>, Camila Linares-Pipón <sup>1</sup>, Ben Bradshaw <sup>2</sup>, Paulina Valenzuela-Hormazabal <sup>3</sup>, David Ramírez <sup>3</sup>, Patricio Muñoz-Torres <sup>4,\*</sup> and Claudio Parra <sup>1,\*</sup>

<sup>1</sup> Departamento de Química Orgánica, Facultad de Ciencias Químicas, Universidad de Concepción, Ed-mundo Larenas 129, Concepción 4070371, Chile.

<sup>2</sup> Laboratori de Química Orgànica, Facultat de Farmàcia, IBUB, Universitat de Barcelona, Av. Joan XXIII, s/n, 08028 Barcelona, Spain

<sup>3</sup> Departamento de Farmacología, Facultad de Ciencias Biológicas, Universidad de Concepción, Concepción 4030000, Chile

<sup>4</sup> Laboratorio de Patología Vegetal y Bioproductos, Facultad de Ciencias Agronómicas, Universidad de Tarapacá, Av. General Velásquez 1775, 1000000 Arica, Chile

\* Correspondence: maxmartinez@udec.cl; cparra@udec.cl; pmunozt@academicos.uta.cl

## Supporting Information

### Table of Contents

|                                                  |           |
|--------------------------------------------------|-----------|
| Experimental and NMR data of compounds           | S2 – S6   |
| Optimized geometries of compounds                | S7 – S13  |
| Docking and Molecular Dynamics data of compounds | S14 – S17 |

## Experimental

**General.** All reactions were carried out under an argon atmosphere with dry, freshly distilled solvents under anhydrous conditions. Analytical thin-layer chromatography was performed on SiO<sub>2</sub> (Merck silica gel 60 F<sub>254</sub>), and the spots were located with 1% aqueous KMnO<sub>4</sub>. Chromatography refers to flash chromatography was carried out on SiO<sub>2</sub> (SDS silica gel 60 ACC, 35-75  $\mu$ m, 230-240 mesh ASTM). Drying of organic extracts during workup of reactions was performed over anhydrous MgSO<sub>4</sub> except where stated otherwise. Evaporation of solvent was accomplished with a rotatory evaporator. NMR spectra were recorded in CDCl<sub>3</sub> on a Varian VNMRs 400. Chemical shifts of <sup>1</sup>H and <sup>13</sup>C NMR spectra are reported in ppm downfield ( $\delta$ ) from Me<sub>4</sub>Si.

### General Procedure: Synthesis of $\beta$ -keto esters 1-8

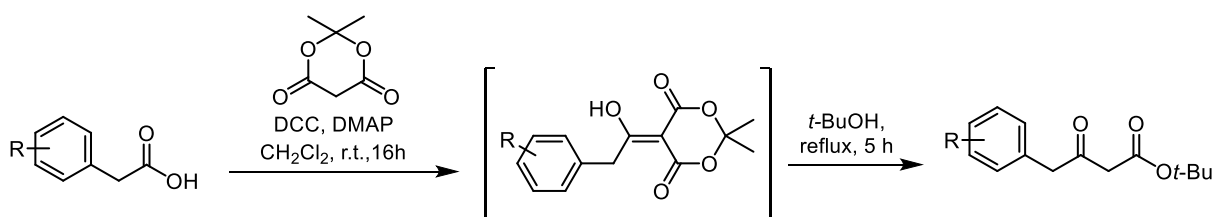

A solution of DCC (1.1 equiv) in CH<sub>2</sub>Cl<sub>2</sub> (1 mL/mmol) was added slowly to a stirred solution of Meldrum's acid (1 equiv), the corresponding carboxylic acid compound (1 equiv), and DMAP (1.1 equiv) in CH<sub>2</sub>Cl<sub>2</sub> (5 mL/mmol) at 0 °C. The reaction mixture was stirred at 0 °C for 16 h and the precipitated solid was removed by filtration and washed with CH<sub>2</sub>Cl<sub>2</sub>. The filtrate was washed with 1 M aq NaHSO<sub>4</sub>, brine, dried (Na<sub>2</sub>SO<sub>4</sub>) and concentrated *in vacuo*. The residue was dissolved *tert*-butanol (4 mL/mmol) and the solution was refluxed under argon for 5 h. Concentration *in vacuo* and purification by column chromatography gave the corresponding  $\beta$ -keto ester product.

***tert*-Butyl 3-Oxo-4-phenylbutanoate (1).** This compound was prepared according to the above general procedure using DCC (1.00 g, 4.84 mmol), Meldrum's acid (0.64 g, 4.41 mmol), phenylacetic acid (0.60 g, 4.41 mmol), and DMAP (0.59 g, 4.84 mmol). Purification by column chromatography (0 $\rightarrow$ 2.5 $\rightarrow$ 5 $\rightarrow$ 10% EtOAc/hexane) gave  $\beta$ -keto ester **1** (0.78 g, 76%) as an amorphous solid. <sup>1</sup>H NMR (CDCl<sub>3</sub>, 400 MHz)  $\delta$  1.46 (s, 9H, CH<sub>3</sub>), 3.37 (s, 2H, H-2), 3.82 (s, 2H, H-4), 7.14-7.37 (m, 5H, o-ArH, p-ArH, m-ArH). <sup>13</sup>C NMR (CDCl<sub>3</sub>, 100 MHz)  $\delta$  28.0 (CH<sub>3</sub>), 49.6 (C-4), 49.9 (C-2), 82.0 (C), 127.3 (o-Ar), 128.8 (m-Ar), 129.6 (p-Ar), 133.4 (ipso-Ar), 166.3 (C-1), 200.9 (C-3). Spectral data was identical to that previously reported [23].

***tert*-Butyl 4-(2-fluorophenyl)-3-oxobutanoate (4).** This compound was prepared according to the above general procedure using DCC (0.79 g, 3.82 mmol), Meldrum's acid (0.50 g, 3.47 mmol), 2-fluorophenylacetic acid (0.59 g, 3.47 mmol), and DMAP (0.47 g, 3.82 mmol). Purification by column chromatography (0 $\rightarrow$ 1 $\rightarrow$ 2.5 $\rightarrow$ 5% EtOAc/hexane) gave  $\beta$ -keto ester **4** (1.09 g, 67%) as a yellow oil. <sup>1</sup>H NMR (CDCl<sub>3</sub>, 400 MHz)  $\delta$  1.49 (s, 9H, CH<sub>3</sub>), 3.45 (s, 2H, H-2), 3.89 (s, 2H, H-4), 7.11 (dd, 2H, Ph), 7.18-7.23 (m, 1H, Ph), 7.27-7.31 (m, 1H, Ph). <sup>13</sup>C NMR (CDCl<sub>3</sub>, 100 MHz)  $\delta$  28.0 (CH<sub>3</sub>), 43.1 (C-4), 50.0 (C-2), 82.3 (CCH<sub>3</sub>), 115.6, 124.4, 129.4, 131.9, (Ph), 166.3 (C-1), 199.7 (C-3). HRMS calcd for C<sub>14</sub>H<sub>17</sub>FO<sub>3</sub> [M-H]<sup>-</sup> 251.1078, found 251.1092. Spectral data was identical to that previously reported

***tert*-Butyl 4-(2-Chlorophenyl)-3-oxobutanoate (5).** This compound was prepared according to the above general procedure using DCC (0.79 g, 3.82 mmol), Meldrum's

acid (0.50 g, 3.47 mmol), 2-chlorophenylacetic acid (0.59 g, 3.47 mmol), and DMAP (0.47 g, 3.82 mmol). Purification by column chromatography (0→1→2.5→5% EtOAc/hexane) gave  $\beta$ -keto ester **5** (830 mg, 89%) as a yellow oil.  $^1\text{H}$  NMR (400 MHz, COSY)  $\delta$  1.47 (s, 9H, CH<sub>3</sub>), 3.43 (s, 2H, H-2), 3.97 (s, 2H, H-4), 7.25 (m, 3H, ArH), 7.39 (dd,  $J$  = 7.5, 3.2 Hz, 1H, ArH-3')  $^{13}\text{C}$  NMR (100 MHz, HSQC)  $\delta$  27.9 (CH<sub>3</sub>), 47.5 (C-4), 50.1 (C-2), 82.1 (C), 127.0 (Ar-5'), 128.9 (Ar-4'), 129.5 (Ar-3'), 131.8 (Ar-6'), 134.5 (Ar-1'), 137.5 (Ar-2'), 166.2 (C-1), 199.5 (C-3). Spectral data was identical to that previously reported [23].

**tert-Butyl 4-(2-Nitrophenyl)-3-oxobutanoate (7).** This compound was prepared according to the above general procedure using DCC (0.88 g, 4.25 mmol), Meldrum's acid (0.56 g, 3.86 mmol), 2-nitrophenylacetic acid (0.70 g, 3.86 mmol), and DMAP (0.52 g, 4.25 mmol). Purification by column chromatography (0→5→10→25% EtOAc/hexane) gave  $\beta$ -keto ester **7** (1.03 g, 96%) as an amorphous solid.  $^1\text{H}$  NMR (400 MHz, COSY)  $\delta$  1.50 (s, 9H, CH<sub>3</sub>), 3.55 (s, 2H, H-2), 4.25 (s, 2H, H-4), 7.31 (dd,  $J$  = 8.0, 1.2 Hz, 1H, Ar-6'), 7.47 (td,  $J$  = 8.0, 1.6 Hz, 1H, ArH-4'), 7.60 (td,  $J$  = 7.6, 1.6 Hz, 1H, ArH-5'), 8.13 (dd,  $J$  = 8.4, 1.2 Hz, 1H, ArH-3');  $^{13}\text{C}$  NMR (100 MHz, HSQC)  $\delta$  28.0 (CH<sub>3</sub>), 47.7 (C-4), 50.6 (C-2), 82.3 (C), 125.3 (Ar-3'), 128.6 (Ar-4'), 129.8 (Ar-5'), 133.7 (Ar-6'), 166.2 (C-1), 198.6 (C-3). Spectral data was identical to that previously reported [23].

**tert-Butyl 4-(4-Chlorophenyl)-3-oxobutanoate (8).** This compound was prepared according to the above general procedure using DCC (0.79 g, 3.82 mmol), Meldrum's acid (0.50 g, 3.47 mmol), 4-chlorophenylacetic acid (0.59 g, 3.47 mmol), and DMAP (0.47 g, 3.82 mmol). Purification by column chromatography (0→1→2.5→5% EtOAc/hexane) gave  $\beta$ -keto ester **8** (0.31 g, 65%) as a yellow oil.  $^1\text{H}$  NMR (CDCl<sub>3</sub>, 400 MHz)  $\delta$  1.48 (s, 9H, CH<sub>3</sub>), 3.40 (s, 2H, H-2), 3.82 (s, 2H, H-4), 7.15 (d, 2H, Ph), 7.32 (d, 2H, Ph).  $^{13}\text{C}$  NMR (CDCl<sub>3</sub>, 100 MHz)  $\delta$  28.1 (CH<sub>3</sub>), 49.1 (C-4), 49.9 (C-2), 82.4 (C), 129.0, 131.1, 131.9, 133.4 (Ph), 166.4 (C-1), 200.4 (C-3). HRMS calcd for C<sub>14</sub>H<sub>17</sub>ClO<sub>3</sub> [M-H]<sup>-</sup> 267.0782, found 267.0766. Spectral data was identical to that previously reported.

**$^1\text{H}$  NMR (400 MHz,  $\text{CDCl}_3$ )**

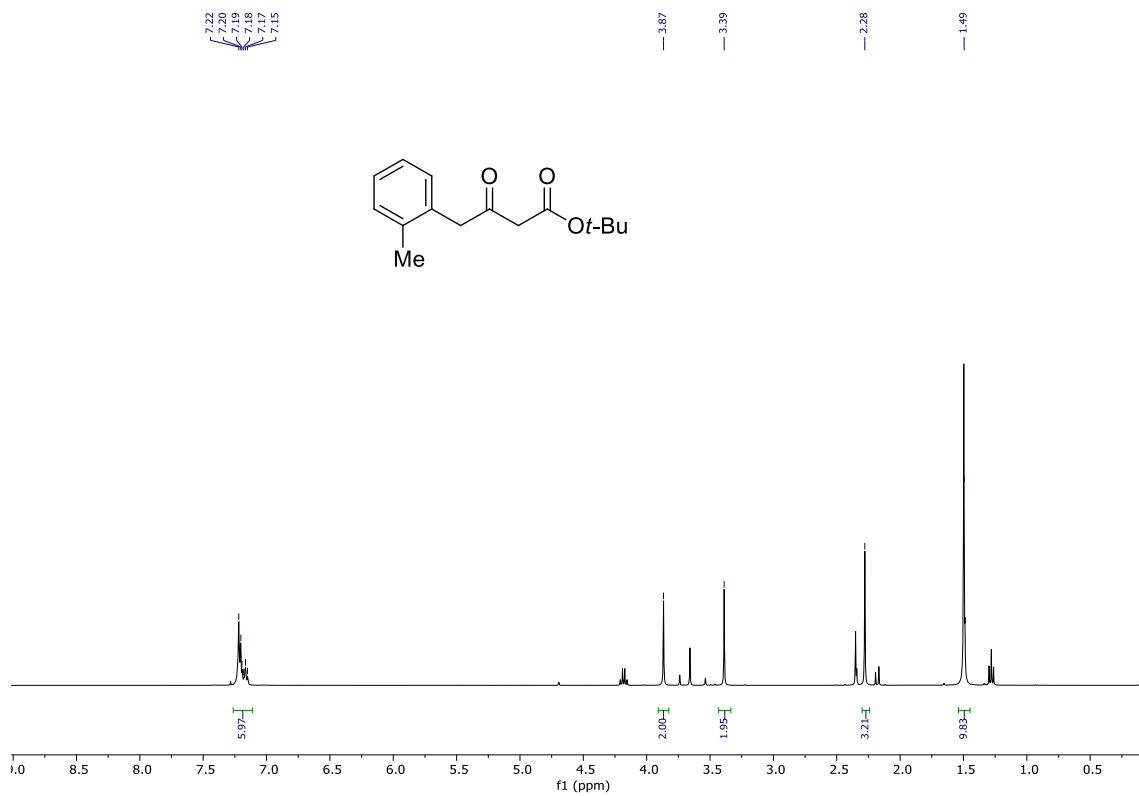

**$^{13}\text{C}$  NMR (100 MHz,  $\text{CDCl}_3$ )**

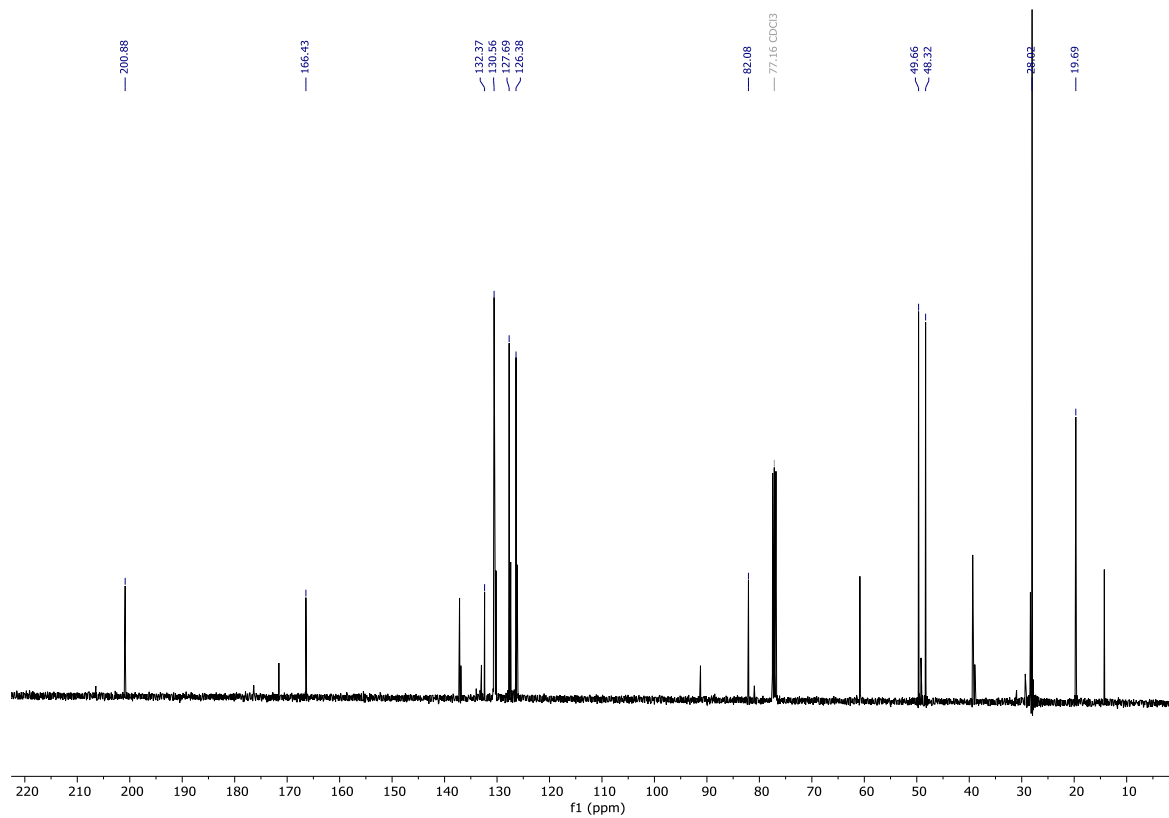

**<sup>1</sup>H NMR (400 MHz, CDCl<sub>3</sub>)**

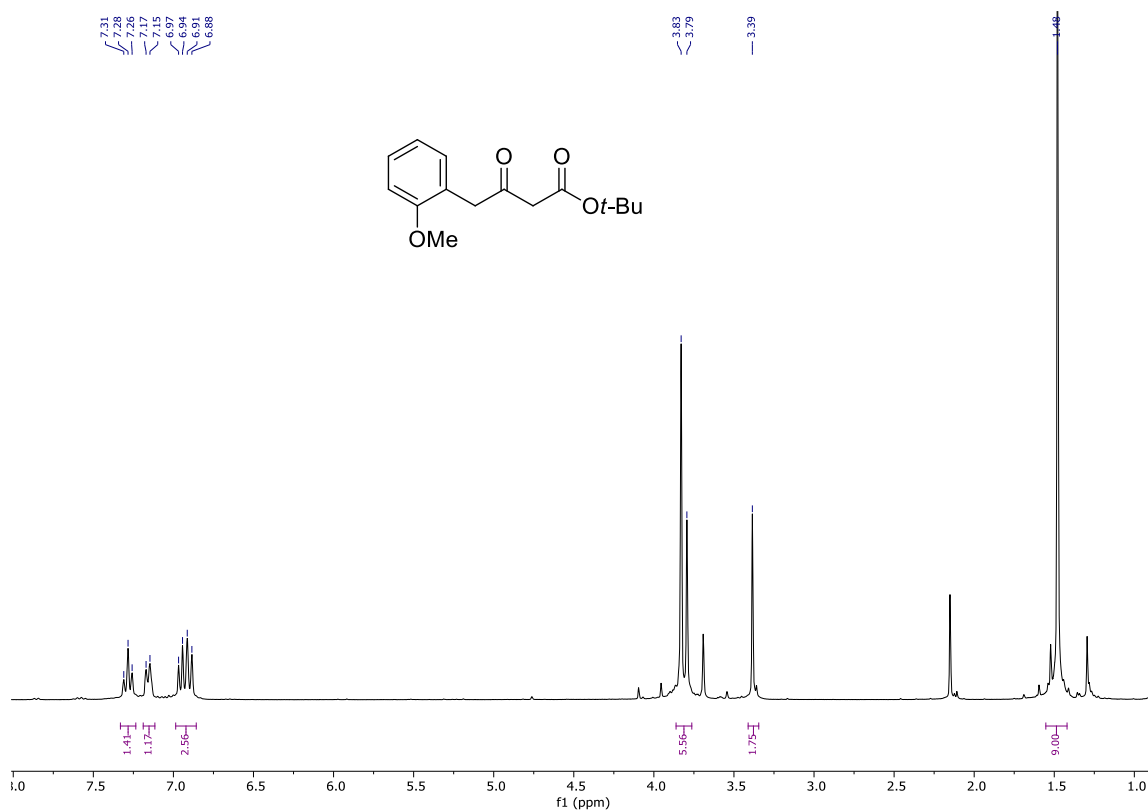

**<sup>13</sup>C NMR (100 MHz, CDCl<sub>3</sub>)**

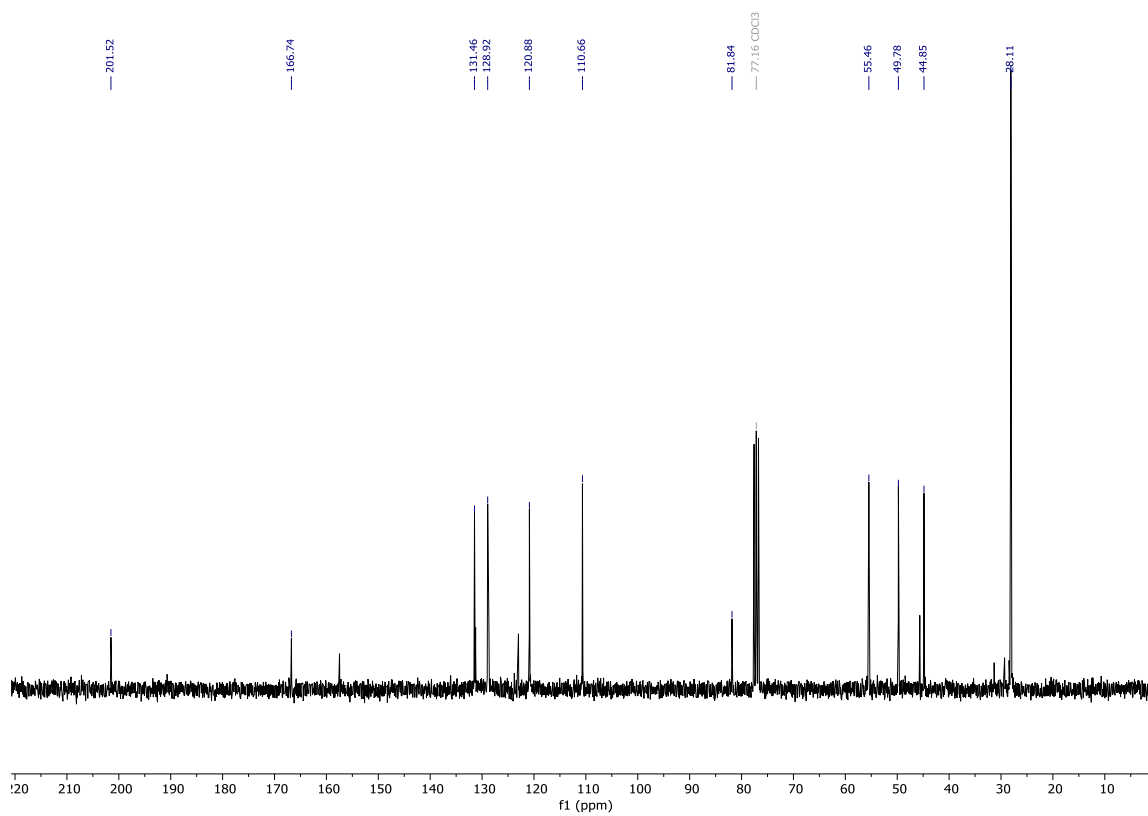

**$^1\text{H}$  NMR (400 MHz,  $\text{CDCl}_3$ )**

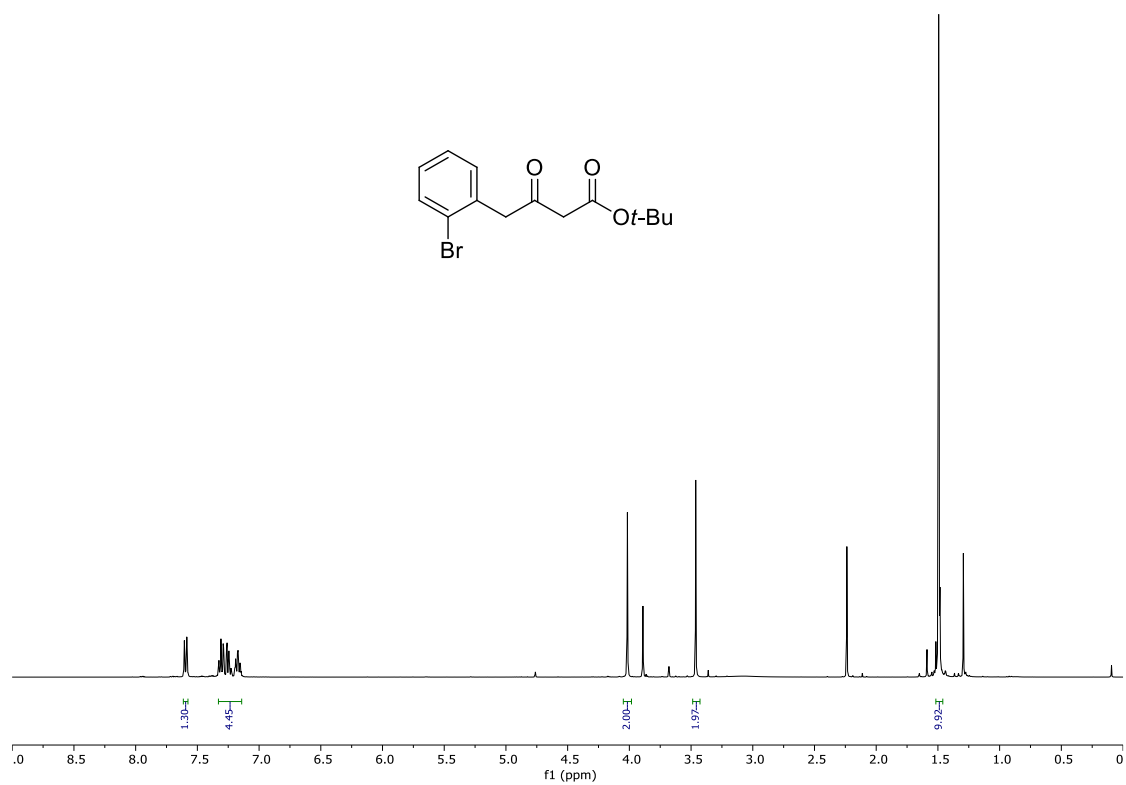

**$^{13}\text{C}$  NMR (100 MHz,  $\text{CDCl}_3$ )**

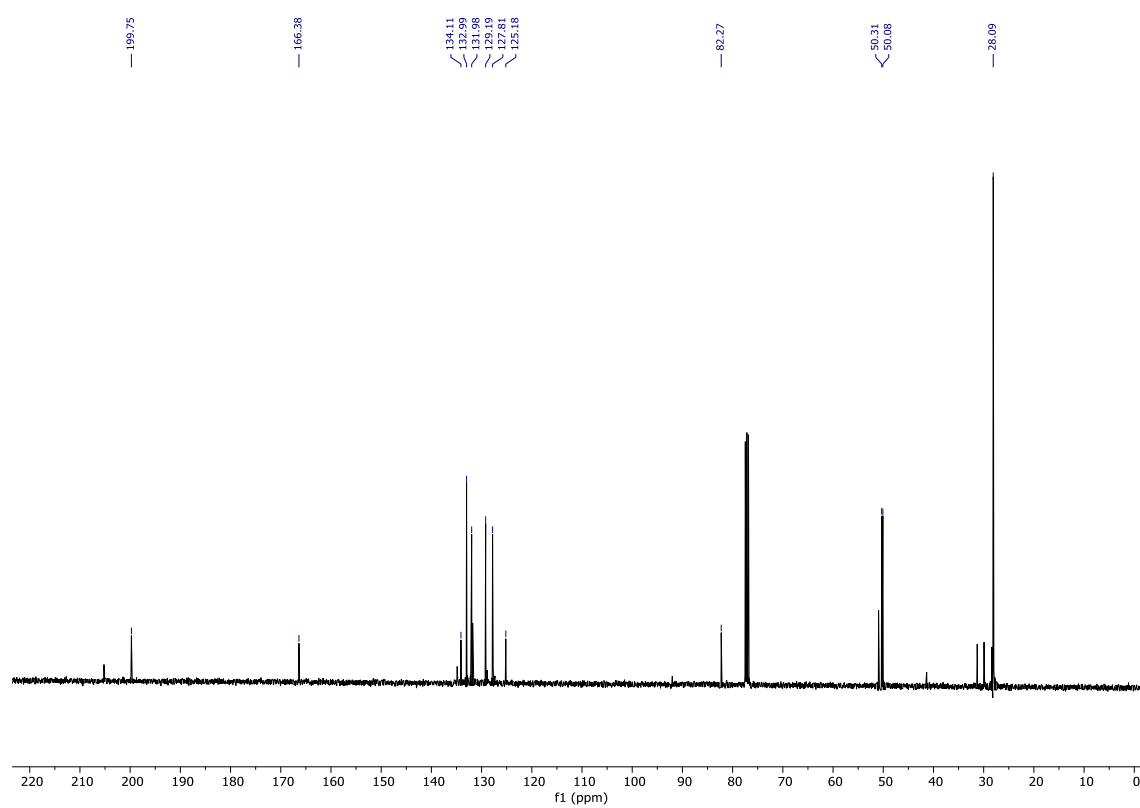

Optimized geometries at DFT M06-2x/6-311+G(d,p) level

Compound 1

|   |             |             |             |
|---|-------------|-------------|-------------|
| C | -2.16063900 | 1.05955500  | -0.77799400 |
| C | -2.16411700 | -0.31648900 | -0.55714500 |
| C | -3.20869800 | -0.87918200 | 0.17795100  |
| C | -4.22636900 | -0.07833900 | 0.68139700  |
| C | -4.21443800 | 1.29566300  | 0.45713800  |
| C | -3.17903000 | 1.86385900  | -0.27551600 |
| H | -1.35329500 | 1.50481000  | -1.34994900 |
| H | -3.21524500 | -1.94641900 | 0.36548200  |
| H | -5.03048900 | -0.52782400 | 1.25210800  |
| H | -5.00932100 | 1.91863400  | 0.84956200  |
| H | -3.16332000 | 2.93194700  | -0.45849000 |
| C | -1.04983000 | -1.16777300 | -1.10081200 |
| H | -1.44773000 | -1.97401600 | -1.73296600 |
| H | -0.38455000 | -0.57619400 | -1.73299300 |
| C | -0.20825800 | -1.86554600 | -0.04032100 |
| C | 1.20397200  | -2.26273000 | -0.45723900 |
| H | 1.26420500  | -2.42273900 | -1.53776700 |
| H | 1.50431500  | -3.17050500 | 0.06285100  |
| C | 2.20319300  | -1.17560100 | -0.09515400 |
| O | -0.61094500 | -2.12089300 | 1.06238700  |
| O | 3.32614400  | -1.39445400 | 0.26220400  |
| O | 1.65301200  | 0.03460100  | -0.24237500 |
| C | 2.37800700  | 1.25218600  | 0.13391800  |
| C | 2.72896500  | 1.20414300  | 1.61694300  |
| H | 3.48960000  | 0.45291700  | 1.82349800  |
| H | 3.10876300  | 2.18139700  | 1.92319600  |
| H | 1.83582600  | 0.98270300  | 2.20569200  |
| C | 3.60726600  | 1.42160500  | -0.75130200 |
| H | 3.32049800  | 1.37928400  | -1.80482700 |
| H | 4.05112800  | 2.40125900  | -0.55919500 |
| H | 4.35243700  | 0.65376100  | -0.55072600 |
| C | 1.35791000  | 2.34781500  | -0.14181700 |
| H | 0.45441800  | 2.18418700  | 0.44924500  |
| H | 1.78053700  | 3.32028200  | 0.11803800  |
| H | 1.08891800  | 2.35747400  | -1.20074900 |

Compound 2

|   |             |             |             |
|---|-------------|-------------|-------------|
| C | -1.85809900 | 1.46829500  | -0.46777400 |
| C | -2.07311700 | 0.09272800  | -0.51370600 |
| C | -3.29826400 | -0.43335200 | -0.07688300 |
| C | -4.27129600 | 0.44596800  | 0.39642200  |
| C | -4.04894900 | 1.81800400  | 0.44454500  |
| C | -2.83568900 | 2.33446800  | 0.00913300  |
| H | -0.90841600 | 1.86312700  | -0.81469800 |
| H | -5.22041100 | 0.04545600  | 0.73703500  |

|   |             |             |             |
|---|-------------|-------------|-------------|
| H | -4.82184100 | 2.47874200  | 0.81912500  |
| H | -2.65064400 | 3.40160400  | 0.03730600  |
| C | -0.97221300 | -0.80141700 | -1.01335300 |
| H | -1.35325400 | -1.57445600 | -1.69402900 |
| H | -0.23447700 | -0.22950600 | -1.58326200 |
| C | -0.21533900 | -1.53893500 | 0.08136100  |
| C | 1.09441500  | -2.19925600 | -0.33968800 |
| H | 1.10578200  | -2.40122800 | -1.41469800 |
| H | 1.23347000  | -3.13118300 | 0.20538100  |
| C | 2.28436400  | -1.30588900 | -0.03102900 |
| O | -0.59805900 | -1.61836400 | 1.21775700  |
| O | 3.35234700  | -1.71603200 | 0.32714100  |
| O | 1.97087700  | -0.02165900 | -0.23550100 |
| C | 2.93263300  | 1.05029600  | 0.03711200  |
| C | 3.33522500  | 1.02533900  | 1.50755400  |
| H | 3.94480200  | 0.15440000  | 1.74187700  |
| H | 3.90931800  | 1.92710300  | 1.73236400  |
| H | 2.44409900  | 1.02026300  | 2.13936500  |
| C | 4.13024000  | 0.92242400  | -0.89728200 |
| H | 3.79557000  | 0.88013600  | -1.93650800 |
| H | 4.76809000  | 1.80162100  | -0.78065000 |
| H | 4.71621900  | 0.03313400  | -0.67116700 |
| C | 2.13103700  | 2.30603900  | -0.27621100 |
| H | 1.25942700  | 2.36974900  | 0.37834500  |
| H | 2.75186100  | 3.19054000  | -0.12149500 |
| H | 1.79444300  | 2.29405400  | -1.31553700 |
| C | -3.56988000 | -1.91474900 | -0.11813700 |
| H | -3.48400900 | -2.30683900 | -1.13600100 |
| H | -2.86357600 | -2.45719800 | 0.51405100  |
| H | -4.57818200 | -2.13087000 | 0.23564000  |

### Compound 3

|   |             |             |             |
|---|-------------|-------------|-------------|
| C | -1.63164900 | 1.85567700  | -0.41629700 |
| C | -1.81541500 | 0.48736400  | -0.54259500 |
| C | -3.04828600 | -0.06698300 | -0.16727100 |
| C | -4.06552000 | 0.74388200  | 0.32702500  |
| C | -3.85387100 | 2.11709800  | 0.44584300  |
| C | -2.64337200 | 2.68012800  | 0.07433600  |
| H | -0.67611500 | 2.28185200  | -0.70498400 |
| H | -5.01697400 | 0.32348100  | 0.62320100  |
| H | -4.64989200 | 2.74240600  | 0.83238600  |
| H | -2.48171300 | 3.74675700  | 0.16633100  |
| C | -0.72524200 | -0.41753800 | -1.02910100 |
| H | -1.10493500 | -1.12316700 | -1.77757500 |
| H | 0.07980900  | 0.15179300  | -1.50264500 |
| C | -0.09702700 | -1.25784200 | 0.07279400  |
| C | 1.10893600  | -2.09941400 | -0.33759000 |
| H | 1.09252800  | -2.31676800 | -1.40953700 |
| H | 1.11247100  | -3.03536700 | 0.21862400  |
| C | 2.41768300  | -1.38715100 | -0.04169700 |

|   |             |             |             |
|---|-------------|-------------|-------------|
| O | -0.49228100 | -1.27503300 | 1.20650000  |
| O | 3.42984400  | -1.95021600 | 0.26910200  |
| O | 2.28039900  | -0.06609500 | -0.20142300 |
| C | 3.38716200  | 0.85628400  | 0.05831300  |
| C | 3.83872900  | 0.73519900  | 1.50949100  |
| H | 4.33633900  | -0.21481700 | 1.69572400  |
| H | 4.53539400  | 1.54694800  | 1.73129200  |
| H | 2.97993800  | 0.82754300  | 2.17818200  |
| C | 4.52047500  | 0.59616100  | -0.92745000 |
| H | 4.14597300  | 0.64152100  | -1.95282500 |
| H | 5.28127700  | 1.37091600  | -0.80738400 |
| H | 4.98073000  | -0.37566500 | -0.75552500 |
| C | 2.75009100  | 2.21639800  | -0.19336100 |
| H | 1.92099500  | 2.37819400  | 0.49845200  |
| H | 3.48936000  | 3.00625100  | -0.04726900 |
| H | 2.37331100  | 2.27595000  | -1.21690800 |
| O | -3.15769500 | -1.41095600 | -0.33879300 |
| C | -4.31836200 | -2.04684200 | 0.15408300  |
| H | -4.17523800 | -3.11158900 | -0.01631700 |
| H | -4.43898000 | -1.86131500 | 1.22547600  |
| H | -5.21240200 | -1.71104300 | -0.38093900 |

#### Compound 4

|   |             |             |             |
|---|-------------|-------------|-------------|
| C | -1.98566200 | 1.50527600  | -0.36185400 |
| C | -2.06758200 | 0.12339100  | -0.51203700 |
| C | -3.26025000 | -0.48558700 | -0.14703300 |
| C | -4.34636400 | 0.21305300  | 0.34312600  |
| C | -4.23871700 | 1.59281900  | 0.48299000  |
| C | -3.05957300 | 2.24005200  | 0.13016000  |
| H | -1.06313100 | 2.00590600  | -0.63629700 |
| H | -5.24724200 | -0.32522400 | 0.60873900  |
| H | -5.07839900 | 2.15857000  | 0.86766600  |
| H | -2.97571100 | 3.31435000  | 0.23817200  |
| C | -0.91805700 | -0.70364900 | -1.00067800 |
| H | -1.25064300 | -1.44666400 | -1.73544300 |
| H | -0.16576400 | -0.08080400 | -1.49128900 |
| C | -0.22599400 | -1.47806700 | 0.11385200  |
| C | 1.07793600  | -2.17336900 | -0.26291300 |
| H | 1.09836700  | -2.41419200 | -1.33004800 |
| H | 1.18892000  | -3.08873600 | 0.31549000  |
| C | 2.28532800  | -1.29633000 | 0.02387300  |
| O | -0.66015000 | -1.55121800 | 1.23042100  |
| O | 3.34696000  | -1.71849500 | 0.38632100  |
| O | 1.99724200  | -0.01043300 | -0.20906400 |
| C | 2.98873700  | 1.04704800  | 0.00402400  |
| C | 3.42871800  | 1.06516100  | 1.46366300  |
| H | 4.02820600  | 0.19133900  | 1.71243000  |
| H | 4.02447100  | 1.96331800  | 1.64211200  |
| H | 2.55474300  | 1.09836500  | 2.11815300  |
| C | 4.15858100  | 0.85840100  | -0.95479300 |

|   |             |             |             |
|---|-------------|-------------|-------------|
| H | 3.79634400  | 0.79024200  | -1.98332800 |
| H | 4.82137700  | 1.72394400  | -0.88396100 |
| H | 4.72809600  | -0.03782900 | -0.71394000 |
| C | 2.20653800  | 2.30870200  | -0.33526200 |
| H | 1.35750700  | 2.41920200  | 0.34249800  |
| H | 2.85102500  | 3.18396700  | -0.23478300 |
| H | 1.83802500  | 2.26400000  | -1.36272300 |
| F | -3.36004800 | -1.81999800 | -0.29528700 |

#### Compound 5

|    |             |             |             |
|----|-------------|-------------|-------------|
| C  | -1.70010600 | 1.77578900  | -0.34841500 |
| C  | -1.88993800 | 0.39922000  | -0.46405700 |
| C  | -3.13731800 | -0.11025300 | -0.10470300 |
| C  | -4.16300100 | 0.70814200  | 0.34775100  |
| C  | -3.94625900 | 2.07632200  | 0.45336800  |
| C  | -2.71255800 | 2.61271900  | 0.10385900  |
| H  | -0.73511300 | 2.19012800  | -0.62052600 |
| H  | -5.11615800 | 0.27031600  | 0.61534700  |
| H  | -4.74341400 | 2.71841000  | 0.80755100  |
| H  | -2.53840500 | 3.67871200  | 0.18339100  |
| C  | -0.77479100 | -0.48923900 | -0.92606000 |
| H  | -1.12903100 | -1.22557900 | -1.65618900 |
| H  | 0.01037100  | 0.09311600  | -1.41629700 |
| C  | -0.11511600 | -1.26667100 | 0.20632800  |
| C  | 1.10185300  | -2.10113000 | -0.17762800 |
| H  | 1.06522200  | -2.39036000 | -1.23218800 |
| H  | 1.13973500  | -2.99882600 | 0.43746900  |
| C  | 2.40220200  | -1.34374700 | 0.03402200  |
| O  | -0.50423400 | -1.23525100 | 1.34127800  |
| O  | 3.43830300  | -1.86915600 | 0.32893900  |
| O  | 2.22652500  | -0.03519500 | -0.18171900 |
| C  | 3.32620200  | 0.92012200  | -0.02733600 |
| C  | 3.84834500  | 0.88832000  | 1.40477200  |
| H  | 4.36858400  | -0.04322400 | 1.62042500  |
| H  | 4.54332800  | 1.71921500  | 1.54582700  |
| H  | 3.02204400  | 1.00920500  | 2.10878600  |
| C  | 4.41684800  | 0.62605600  | -1.05081900 |
| H  | 3.99269200  | 0.59844900  | -2.05734200 |
| H  | 5.16046500  | 1.42550200  | -1.01568200 |
| H  | 4.91223000  | -0.32109700 | -0.84356200 |
| C  | 2.65077000  | 2.25254800  | -0.32246100 |
| H  | 1.84954400  | 2.43554400  | 0.39643200  |
| H  | 3.37861200  | 3.06278200  | -0.24952400 |
| H  | 2.23050900  | 2.25125100  | -1.33083700 |
| Cl | -3.44345700 | -1.82622900 | -0.23369400 |

#### Compound 6

|   |             |            |             |
|---|-------------|------------|-------------|
| C | -1.10045600 | 2.14345300 | -0.29913700 |
| C | -1.44208800 | 0.79548300 | -0.41474300 |

|    |             |             |             |
|----|-------------|-------------|-------------|
| C  | -2.74264400 | 0.43181900  | -0.06424900 |
| C  | -3.67310600 | 1.36376500  | 0.37671700  |
| C  | -3.30408800 | 2.69907500  | 0.48131700  |
| C  | -2.01428800 | 3.09106700  | 0.14284900  |
| H  | -0.09229400 | 2.44506300  | -0.56308500 |
| H  | -4.67252500 | 1.04277100  | 0.63998100  |
| H  | -4.02672200 | 3.42729900  | 0.82920300  |
| H  | -1.72032500 | 4.13040000  | 0.22299200  |
| C  | -0.41873000 | -0.20328400 | -0.86373500 |
| H  | -0.84239800 | -0.91894500 | -1.57592100 |
| H  | 0.41371100  | 0.29395000  | -1.37073800 |
| C  | 0.18564100  | -1.00371600 | 0.28270100  |
| C  | 1.27577300  | -2.00028900 | -0.09946000 |
| H  | 1.19388300  | -2.29223000 | -1.15025600 |
| H  | 1.20047300  | -2.88601100 | 0.52900000  |
| C  | 2.66017400  | -1.40839600 | 0.10387100  |
| O  | -0.14012400 | -0.86315200 | 1.42917600  |
| O  | 3.60421400  | -2.03125600 | 0.50024400  |
| O  | 2.67035900  | -0.11519400 | -0.24213000 |
| C  | 3.87704300  | 0.70354500  | -0.10207700 |
| C  | 4.31106800  | 0.74328400  | 1.35883100  |
| H  | 4.69457600  | -0.22059200 | 1.68874000  |
| H  | 5.09717600  | 1.49296800  | 1.47464000  |
| H  | 3.46813500  | 1.02918100  | 1.99211700  |
| C  | 4.97262900  | 0.17603100  | -1.02140400 |
| H  | 4.60119800  | 0.09997300  | -2.04603100 |
| H  | 5.81143200  | 0.87578300  | -1.01371900 |
| H  | 5.32889100  | -0.79939200 | -0.69445600 |
| C  | 3.40086600  | 2.07615400  | -0.55821800 |
| H  | 2.60101500  | 2.43350900  | 0.09362000  |
| H  | 4.22688400  | 2.78866100  | -0.52006800 |
| H  | 3.02827900  | 2.02863900  | -1.58390700 |
| Br | -3.29467900 | -1.38691900 | -0.18257200 |

#### Compound 7

|   |             |             |             |
|---|-------------|-------------|-------------|
| C | -1.45376500 | 1.93036700  | -0.69721300 |
| C | -1.67775900 | 0.55428600  | -0.64519200 |
| C | -2.86194000 | 0.14479000  | -0.02740400 |
| C | -3.77873700 | 1.03480800  | 0.51207900  |
| C | -3.53441700 | 2.39748900  | 0.42363300  |
| C | -2.36742700 | 2.84382300  | -0.18405700 |
| H | -0.53462500 | 2.28707400  | -1.14868200 |
| H | -4.66671800 | 0.64561300  | 0.99174500  |
| H | -4.24904100 | 3.10176700  | 0.83054200  |
| H | -2.16158200 | 3.90515100  | -0.25378400 |
| C | -0.62196300 | -0.37725200 | -1.17003300 |
| H | -1.00782900 | -1.02086300 | -1.96482000 |
| H | 0.20780200  | 0.20074500  | -1.58466800 |
| C | -0.04475400 | -1.29417700 | -0.09944200 |
| C | 1.19044400  | -2.09103200 | -0.49574300 |

|   |             |             |             |
|---|-------------|-------------|-------------|
| H | 1.23216000  | -2.23765700 | -1.57872000 |
| H | 1.17650700  | -3.05963900 | 0.00060600  |
| C | 2.46370700  | -1.37345000 | -0.07819400 |
| O | -0.51032100 | -1.38876200 | 1.00375100  |
| O | 3.45303800  | -1.93078200 | 0.30328800  |
| O | 2.31910700  | -0.04979600 | -0.21793900 |
| C | 3.38094700  | 0.88219200  | 0.16943800  |
| C | 3.68048500  | 0.73490900  | 1.65690900  |
| H | 4.16798400  | -0.21397600 | 1.87387200  |
| H | 4.34012000  | 1.54805100  | 1.96797600  |
| H | 2.75537600  | 0.80305100  | 2.23378200  |
| C | 4.61339800  | 0.65819100  | -0.69868900 |
| H | 4.34437600  | 0.70905500  | -1.75650700 |
| H | 5.34120100  | 1.44669600  | -0.49387600 |
| H | 5.07465000  | -0.30629100 | -0.49231700 |
| C | 2.75058600  | 2.23756700  | -0.12114400 |
| H | 1.84348100  | 2.36664600  | 0.47320900  |
| H | 3.45104900  | 3.03643500  | 0.12910900  |
| H | 2.49559900  | 2.31770400  | -1.18051900 |
| N | -3.21631300 | -1.28759700 | 0.06800700  |
| O | -3.91785000 | -1.62777400 | 0.99075400  |
| O | -2.81011600 | -2.02931800 | -0.80394100 |

#### Compound 8

|   |             |             |             |
|---|-------------|-------------|-------------|
| C | 1.59514400  | -0.47360300 | -1.00491700 |
| C | 1.37163100  | 0.87286900  | -0.72740400 |
| C | 2.36295100  | 1.59412100  | -0.06061400 |
| C | 3.55126800  | 0.98622900  | 0.32123300  |
| C | 3.74662200  | -0.35843600 | 0.03281700  |
| C | 2.77971300  | -1.09882800 | -0.62984000 |
| H | 0.83329400  | -1.04567700 | -1.52328300 |
| H | 4.31990600  | 1.54346700  | 0.84140600  |
| H | 2.95353700  | -2.14474600 | -0.84830700 |
| C | 0.07638400  | 1.52267700  | -1.12588400 |
| H | 0.26009700  | 2.41682300  | -1.73773700 |
| H | -0.52803300 | 0.84643900  | -1.73373400 |
| C | -0.77081200 | 2.00047200  | 0.04752800  |
| C | -2.25928300 | 2.17856000  | -0.22632700 |
| H | -2.43823300 | 2.41173300  | -1.28026300 |
| H | -2.65893200 | 2.97742600  | 0.39547100  |
| C | -3.03652700 | 0.91227100  | 0.09841700  |
| O | -0.31463700 | 2.24992900  | 1.13046500  |
| O | -4.15039400 | 0.91109000  | 0.54027200  |
| O | -2.31111200 | -0.17328900 | -0.19207200 |
| C | -2.81635300 | -1.52240800 | 0.08357300  |
| C | -3.07098000 | -1.68300400 | 1.57801200  |
| H | -3.91486300 | -1.07882000 | 1.90697400  |
| H | -3.28851700 | -2.73258900 | 1.78842800  |
| H | -2.18119300 | -1.39734300 | 2.14355400  |
| C | -4.06191200 | -1.79266200 | -0.75259900 |

|    |             |             |             |
|----|-------------|-------------|-------------|
| H  | -3.85707300 | -1.59722300 | -1.80789100 |
| H  | -4.33677300 | -2.84480300 | -0.64861800 |
| H  | -4.90040800 | -1.17777700 | -0.42970100 |
| C  | -1.66121800 | -2.40789400 | -0.36236000 |
| H  | -0.75736800 | -2.16156200 | 0.19889600  |
| H  | -1.90933700 | -3.45669000 | -0.18898500 |
| H  | -1.46564300 | -2.26850200 | -1.42827600 |
| H  | 2.19970500  | 2.63914000  | 0.17434200  |
| Cl | 5.23760000  | -1.13019500 | 0.51285900  |

## Docking and Molecular Dynamics

Energies of the docking score and MMGBSA  $\Delta G$  bind

LuxS

| Compound | Docking Score (Kcal/mol) | MMGBSA dG Bind (Kcal/mol) |
|----------|--------------------------|---------------------------|
| 1_1      | -3.781                   | -22.82                    |
| 1_2      | -3.533                   | -22.15                    |
| 1_3      | -3.576                   | -21.5                     |
| 1_4      | -3.657                   | -20.8                     |
| 1_5      | -4.413                   | -20.43                    |
| 1_6      | -3.585                   | -20.39                    |
| 1_7      | -3.816                   | -18.17                    |
| 1_8      | -3.97                    | -17.89                    |
| 1_9      | -3.402                   | -17.45                    |
| 2_1      | -3.475                   | -29.17                    |
| 2_2      | -3.604                   | -26.23                    |
| 2_3      | -3.39                    | -24.63                    |
| 2_4      | -4.002                   | -24.32                    |
| 2_5      | -3.289                   | -20.67                    |
| 2_6      | -4.271                   | -19.04                    |
| 2_7      | -3.828                   | -18.76                    |
| 2_8      | -3.561                   | -16.56                    |
| 3_1      | -4.052                   | -28.77                    |
| 3_2      | -3.476                   | -25.3                     |
| 3_3      | -3.455                   | -24.57                    |
| 3_4      | -3.726                   | -23.94                    |
| 3_5      | -3.79                    | -23.24                    |
| 3_6      | -3.342                   | -23.22                    |
| 3_7      | -3.806                   | -22.41                    |
| 3_8      | -3.423                   | -22.27                    |
| 3_9      | -3.853                   | -21.67                    |
| 3_10     | -4.082                   | -20.46                    |
| 4_1      | -4.265                   | -28.34                    |
| 4_2      | -3.641                   | -25.72                    |
| 4_3      | -4.08                    | -24.98                    |
| 4_4      | -3.978                   | -24.27                    |
| 4_5      | -4.016                   | -24.12                    |
| 4_6      | -3.449                   | -21.76                    |
| 4_7      | -3.709                   | -20.8                     |
| 4_8      | -3.973                   | -20.19                    |
| 4_9      | -3.561                   | -19.74                    |
| 4_10     | -3.887                   | -18.57                    |
| 5_1      | -3.981                   | -28.55                    |
| 5_2      | -4.294                   | -28.13                    |
| 5_3      | -4.022                   | -27.83                    |

|      |        |        |
|------|--------|--------|
| 5_4  | -3.984 | -27.48 |
| 5_5  | -4.164 | -27.46 |
| 5_6  | -3.418 | -26.94 |
| 5_7  | -3.942 | -26.6  |
| 5_8  | -3.7   | -25.86 |
| 5_9  | -3.966 | -24.56 |
| 5_10 | -3.719 | -23.28 |
| 6_1  | -4.011 | -28.35 |
| 6_2  | -4.115 | -27.8  |
| 6_3  | -4.116 | -27.56 |
| 6_4  | -4.202 | -27.5  |
| 6_5  | -4.142 | -26.65 |
| 6_6  | -4.101 | -26.04 |
| 6_7  | -3.594 | -25.13 |
| 6_8  | -3.865 | -24.76 |
| 6_9  | -3.86  | -24.16 |
| 6_10 | -3.913 | -24.13 |
| 7_1  | -1.188 | -31.69 |
| 7_2  | -1.233 | -29.91 |
| 7_3  | -3.978 | -28.41 |
| 7_4  | -4.16  | -27.88 |
| 7_5  | -3.209 | -24.03 |
| 7_6  | -4.048 | -23.78 |
| 7_7  | -3.643 | -23.73 |
| 7_8  | -3.549 | -23.32 |
| 7_9  | -3.819 | -23.14 |
| 7_10 | -2.942 | -18.71 |
| 8_1  | -4.085 | -31.38 |
| 8_2  | -4.337 | -29.43 |
| 8_3  | -3.95  | -27.79 |
| 8_4  | -4.903 | -27.42 |
| 8_5  | -4.05  | -27.1  |
| 8_6  | -3.59  | -26.14 |
| 8_7  | -4.438 | -25.84 |
| 8_8  | -4.18  | -25.78 |

LasR

| Compound | Docking Score (Kcal/mol) | MMGBSA dG Bind (Kcal/mol) |
|----------|--------------------------|---------------------------|
| 1_1      | -6.405                   | -69.71                    |
| 1_2      | -6.653                   | -69.52                    |
| 1_3      | -4.165                   | -67.92                    |
| 1_4      | -6.805                   | -67.11                    |
| 1_5      | -6.713                   | -65.36                    |
| 1_6      | -6.687                   | -63.55                    |
| 1_7      | -5.395                   | -63.18                    |
| 1_8      | -5.226                   | -61.78                    |

|      |        |        |
|------|--------|--------|
| 1_9  | -6.183 | -61.22 |
| 1_10 | -6.258 | -60.87 |
| 2_1  | -2.742 | -75.95 |
| 2_2  | -4.436 | -73.99 |
| 2_3  | -5.555 | -72.78 |
| 2_4  | -5.117 | -72.42 |
| 2_5  | -5.602 | -65.91 |
| 2_6  | -6.327 | -65.08 |
| 2_7  | -6.16  | -64.11 |
| 2_8  | -4.153 | -63.56 |
| 2_9  | -4.927 | -63.05 |
| 3_1  | -5.253 | -71.19 |
| 3_2  | -5.863 | -68.06 |
| 3_3  | -5.142 | -67.05 |
| 3_4  | -5.163 | -66.96 |
| 3_5  | -4.984 | -66.68 |
| 3_6  | -5.499 | -66.58 |
| 3_7  | -6.75  | -66.11 |
| 3_8  | -6.282 | -65.42 |
| 3_9  | -6.016 | -60.31 |
| 3_10 | -6.383 | -58    |
| 4_1  | -7.291 | -73.54 |
| 4_2  | -6.234 | -73.5  |
| 4_3  | -6.746 | -71.67 |
| 4_4  | -7.503 | -69.71 |
| 4_5  | -6.15  | -67.06 |
| 4_6  | -6.454 | -66.98 |
| 4_7  | -5.623 | -66.34 |
| 4_8  | -4.517 | -65    |
| 4_9  | -4.399 | -63.55 |
| 4_10 | -5.915 | -58.34 |
| 5_1  | -7.439 | -80.07 |
| 5_2  | -5.787 | -75.84 |
| 5_3  | -7.341 | -74.39 |
| 5_4  | -5.726 | -72.56 |
| 5_5  | -6.187 | -72.22 |
| 5_6  | -4.666 | -72.14 |
| 5_7  | -6.904 | -68.54 |
| 5_8  | -5.086 | -68.5  |
| 5_9  | -7.088 | -68.23 |
| 5_10 | -4.984 | -62.93 |
| 6_1  | -4.335 | -77.37 |
| 6_2  | -5.865 | -76.88 |
| 6_3  | -5.413 | -76.79 |
| 6_4  | -6.027 | -74.84 |
| 6_5  | -6     | -74.6  |
| 6_6  | -4.381 | -71.78 |

|      |        |        |
|------|--------|--------|
| 6_7  | -5.066 | -70.14 |
| 6_8  | -7.223 | -68.99 |
| 6_9  | -4.914 | -64.57 |
| 7_1  | -3.555 | -73.08 |
| 7_2  | -5.819 | -69.85 |
| 7_3  | -5.32  | -69.85 |
| 7_4  | -6.6   | -68.05 |
| 7_5  | -4.217 | -67.86 |
| 7_6  | -5.045 | -67.07 |
| 7_7  | -5.355 | -66.02 |
| 7_8  | -4.966 | -62.39 |
| 7_9  | -3.531 | -58.69 |
| 7_10 | -4.639 | -57.75 |
| 8_1  | -4.649 | -77.67 |
| 8_2  | -4.517 | -77.22 |
| 8_3  | -5.051 | -73.77 |
| 8_4  | -6.766 | -72.77 |
| 8_5  | -6.427 | -72.67 |
| 8_6  | -7.238 | -72.63 |
| 8_7  | -4.931 | -70.49 |
| 8_8  | -6.433 | -70.37 |
| 8_9  | -6.346 | -66.48 |
